# Supplementary material for: Use of Chemcatcher® passive sampler with high-resolution mass spectrometry and multi-variate analysis for targeted screening of emerging pesticides in water
Source: Royal Society of Chemistry journal article supplement (doi:10.1039/d0ay01193b), 2020-01-01
Supplement: d0ay01193b1.pdf [file d0ay01193b1.pdf]

## Electronic supplementary information

### **Use of Chemcatcher<sup>®</sup> passive sampler with high-resolution mass spectrometry and multi-variate analysis for targeted screening of emerging pesticides in water**

Adam C. Taylor<sup>a</sup>, Gary R. Fones<sup>a\*</sup>, Anthony Gravell<sup>b</sup>, and Graham A. Mills<sup>c</sup>

<sup>a</sup>School of the Environment, Geography and Geosciences, University of Portsmouth, Burnaby Road, Portsmouth, PO1 3QL, UK.

\* Corresponding author: Gary Fones: gary.fones@port.ac.uk; +44(0)23 9284 2252.

<sup>b</sup>Natural Resources Wales, Faraday Building, Swansea University, Singleton Campus, Swansea, SA2 8PP, UK.

<sup>c</sup>School of Pharmacy and Biomedical Sciences, University of Portsmouth, White Swan Road, Portsmouth, PO1 2DT, UK.

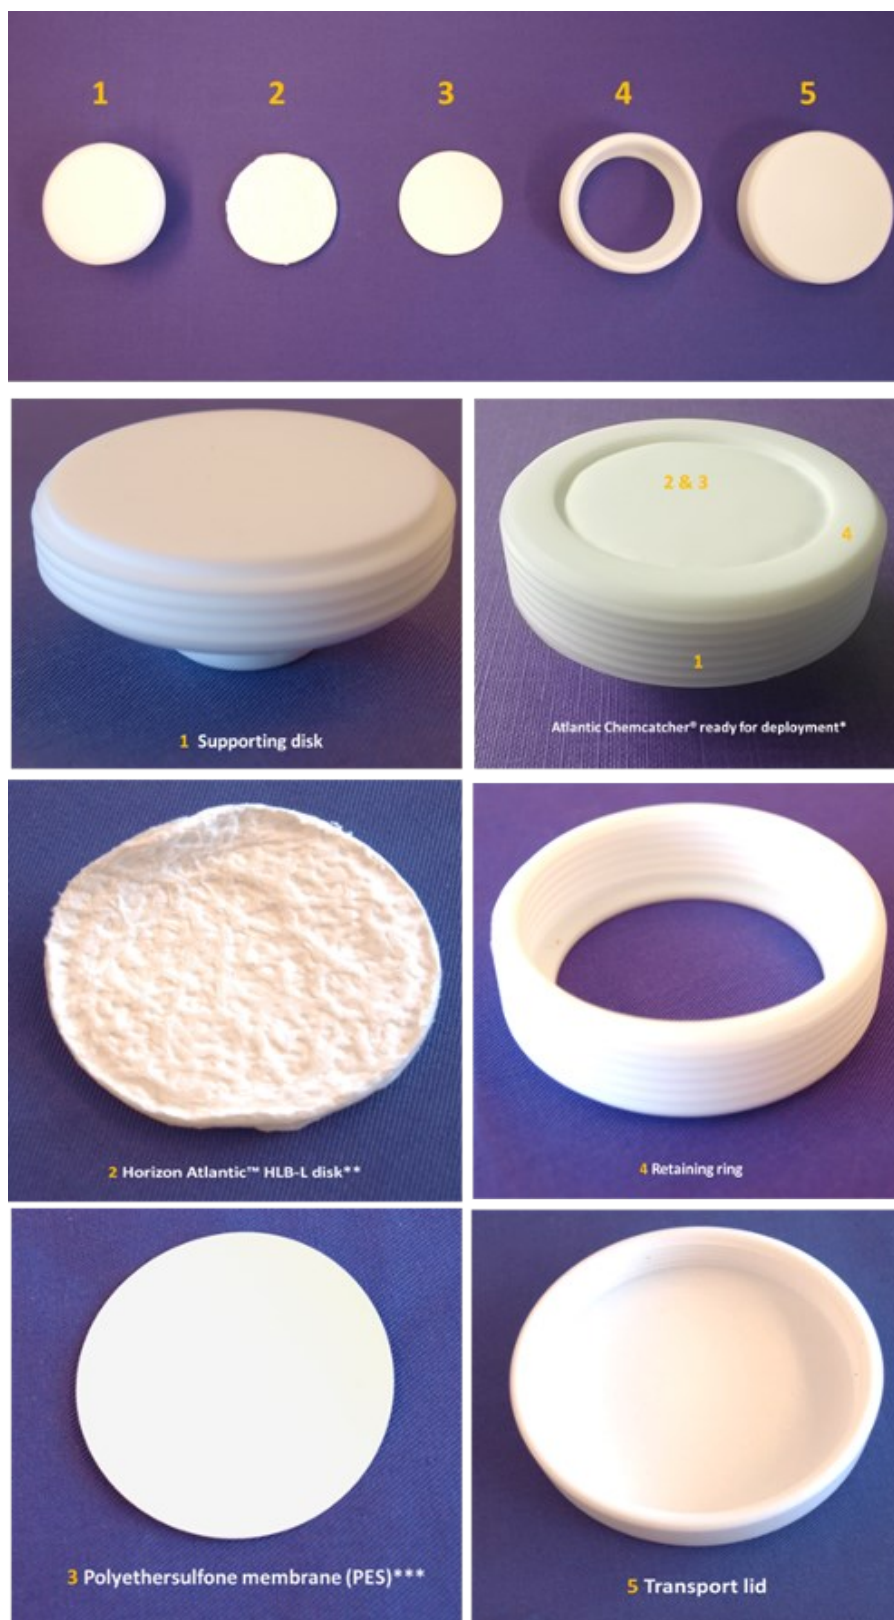

**Fig. S1** Components of the Atlantic® version of the Chemcatcher® PSD. \*The Chemcatcher® is made of machined PTFE, \*\*Atlantic® HLB-L disk (47 mm diameter) and \*\*\*PES, Supor®200, pore size: 0.2 µm, 52 mm diameter disk.

## Study area

The Arun and Western Rother river catchment (AWRRC) in South East England is used for the capitiation of potable water and has diverse hydrology, land use, and pollution sources. The major rivers within the AWRRC are the Western Rother draining 350 km<sup>2</sup> and the Arun draining 380 km<sup>2</sup>. These rivers meet at Pulborough, where there are surface water abstractions for public supply on each river, alongside a groundwater (greensand) abstraction for public supply. Land use within the catchment is primarily arable or pasture, with scattered urban conurbations (e.g. Horsham, Petersfield, Midhurst and Pulborough), industry, woodland, meadow and amenity grassland. Chalk and lower greensand aquifers underlie much of the Western Rother catchment and contribute to the headwaters of many of the tributaries. Tributaries underlain by the upper greensand on the Arun are not primarily groundwater fed and run-off following precipitation and discharges constitute the majority of flow. Consequently, where the influence of groundwater is lower the hydrological regime is flashier as run-off and discharges are precipitation dependant. For these reasons' natural low flows on the Western Rother are high, and relatively stable and natural low flows on the Arun are comparatively low at 5 ML day<sup>-1</sup>. This is augmented by daily discharges (primarily wastewater treatment works (WWTW) outfalls totalling 18 ML day<sup>-1</sup>, meaning tangible low flow on the Arun is 23 ML day<sup>-1</sup>.<sup>28</sup> The river Arun is tidal below the confluence of the Arun and the Western Rother.

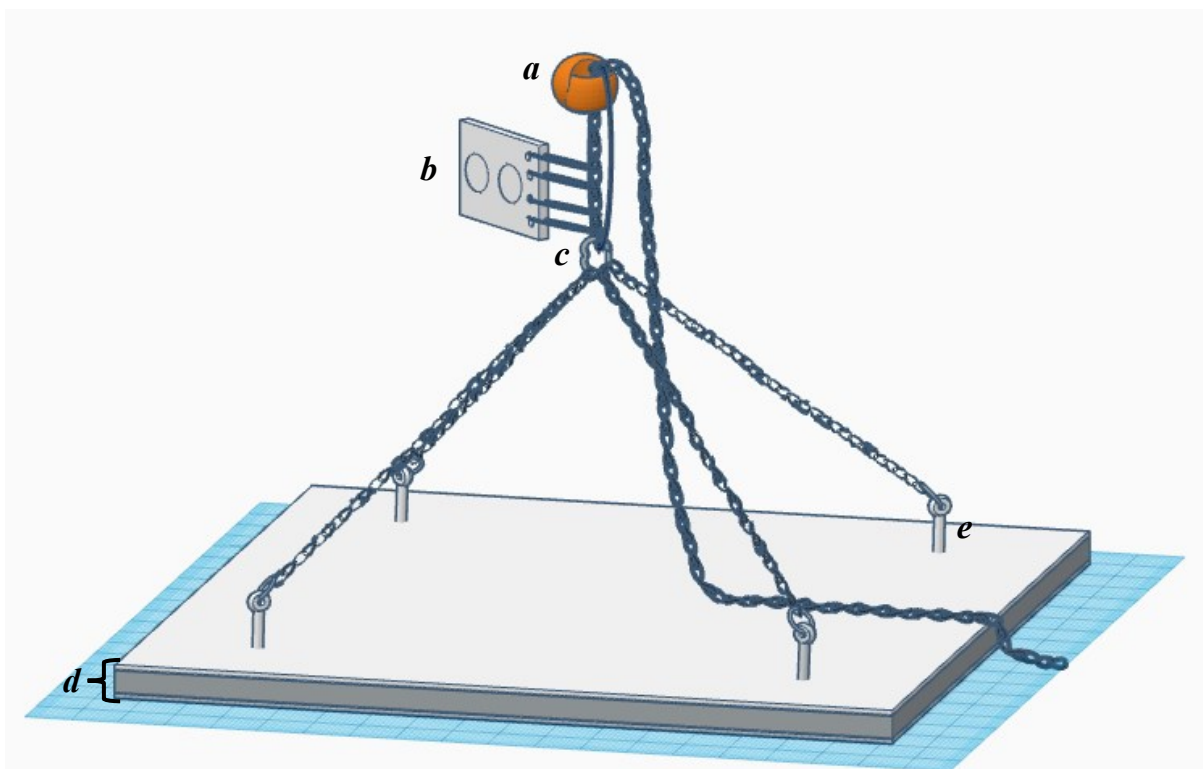

**Fig. S2** Schematic of Chemcatcher<sup>®</sup> deployment apparatus for *in-situ* deployment on the riverbed. (a) Dummy buoy sits below surface and helps position rig and Chemcatcher<sup>®</sup> PSDs in the water column; (b) Chemcatcher<sup>®</sup> PSDs inset in sheet of cast acrylic and to rig with polypropylene rope; (c) Carabiner clip connecting all components of rig; (d) concrete slab sandwiched between two cast acrylic sheets (450 x 450 x 35 mm); (e) Stainless steel (marine grade) eyebolt with ring attached to japped chain at each corner; (g) Japped chain, running slack along riverbed to a point on bank where chain is secured with a padlock.

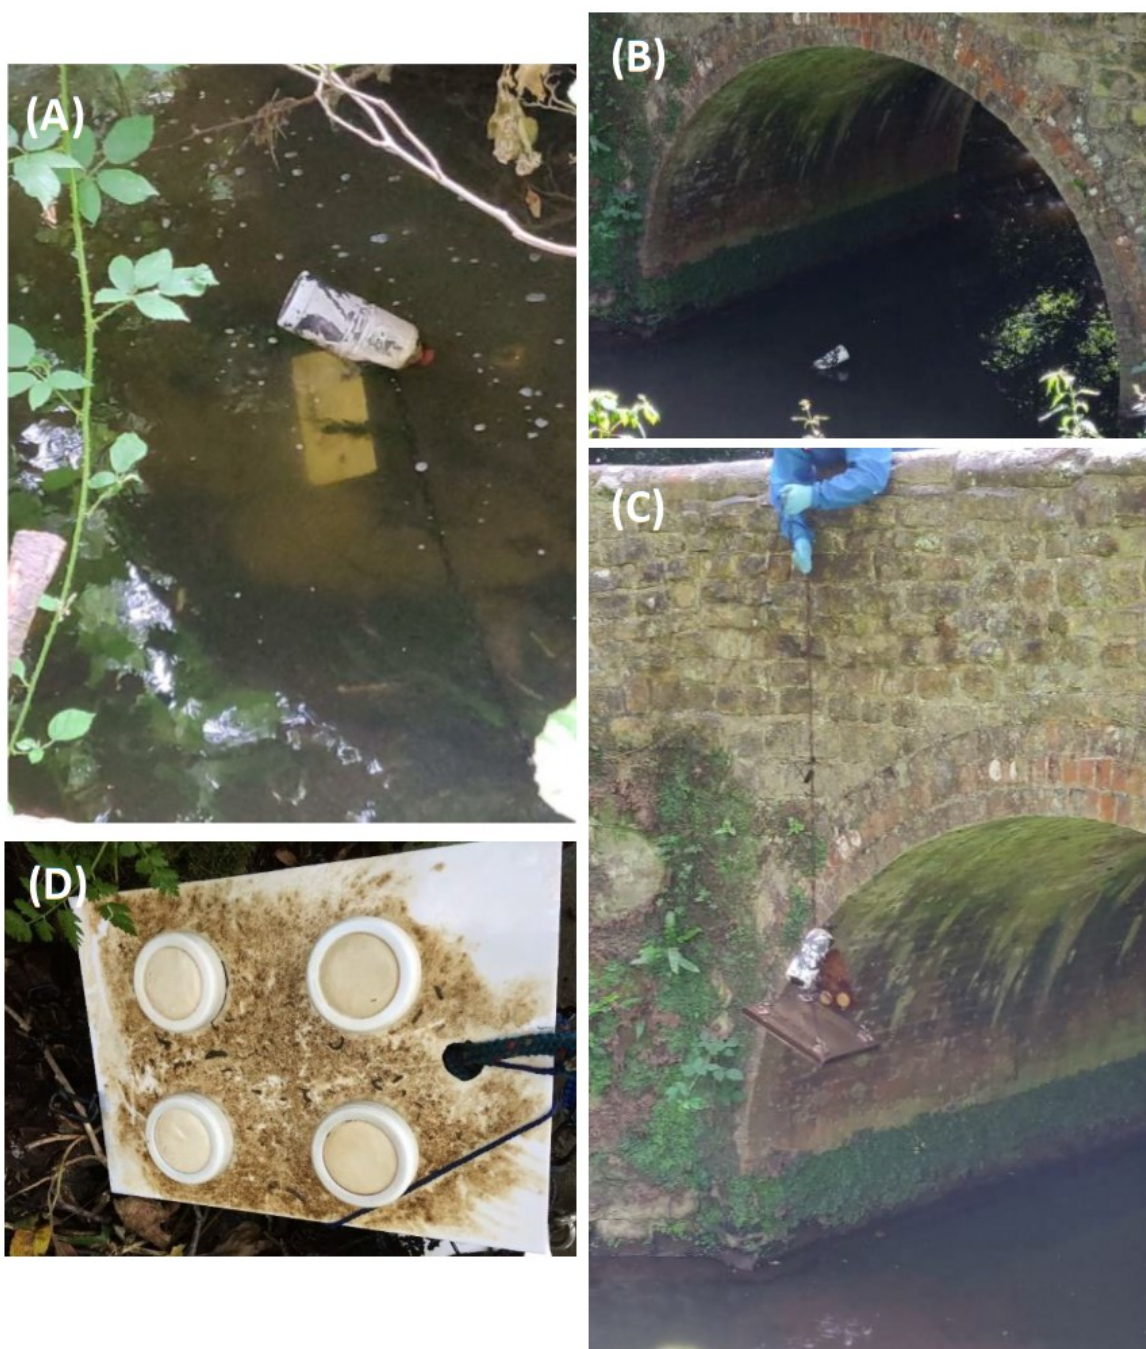

**Fig. S3** Photographs of a rig type deployment system, showing Chemcatcher® devices during deployment (A), (B), during retrieval (C), and 4 Chemcatcher® devices secured in a plastic mount after retrieval (D).

**Table S1** Details of analytes detected in solvent and blank samples (SB = solvent blank; PB = procedural blank; FB = field blank)

| Sample type | Sample name | No. runs* | No. analytes |
|-------------|-------------|-----------|--------------|
|-------------|-------------|-----------|--------------|

|         |                            |     |    |
|---------|----------------------------|-----|----|
| Solvent | Mobile phase A & B (Total) | 47  | 8  |
| Sample  | SB (Total)                 | 66  | 28 |
| Sample  | PB (Total)                 | 66  | 28 |
| Sample  | FB (Total)                 | 78  | 26 |
| Sample  | (Combined) SB,PB,FB        | 210 | 30 |

\*Number of instrumental runs.

**Table S2** Treatment of analytes present in blank and solvent samples.

| Analyte                                       | Treatment                                         |
|-----------------------------------------------|---------------------------------------------------|
| 1,2,3,6-Tetrahydrophthalimide ( <i>cis</i> -) | False negatives: Left in data (blank subtraction) |
| Carbofuran                                    | False positives: removed from data                |
| Carvone                                       | False positives: removed from data                |
| Diethyltoluamide (DEET)                       | False negatives: Left in data (blank subtraction) |
| Dimethylphthalate                             | False positives: removed from data                |
| Hymexazol                                     | False positives: removed from data                |
| Melamine                                      | False positives: removed from data                |
| Methoprene Peak 1 Fragm 279                   | False positives: removed from data                |
| Methoprene Peak 2 Fragm 279                   | False positives: removed from data                |
| Metolcarb Fragm 109                           | False positives: removed from data                |
| Pyrethrin I                                   | False positives: removed from data                |
| Spiroxamine Peak 1                            | False positives: removed from data                |
| Spiroxamine Peak 2                            | False positives: removed from data                |
| Thiabendazole                                 | False positives: removed from data                |
| Trimethacarb (2,3,5-) Fragm 137               | False positives: removed from data                |
| Triphenylphosphate                            | False negatives: Left in data (blank subtraction) |
| Halofenozide Fragm 105                        | False positives: removed from data                |
| Methoxyfenozide Fragm 149                     | False positives: removed from data                |

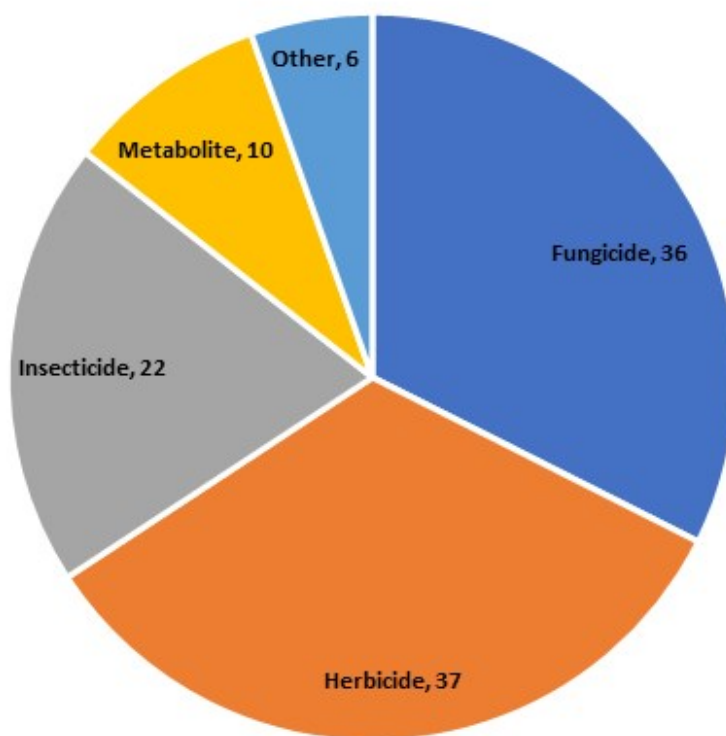

**Fig. S4** Number of types of polar pesticides detected with Chemcatcher® PSDs during 25 consecutive deployments at three sites on the River Arun occurring over one year.

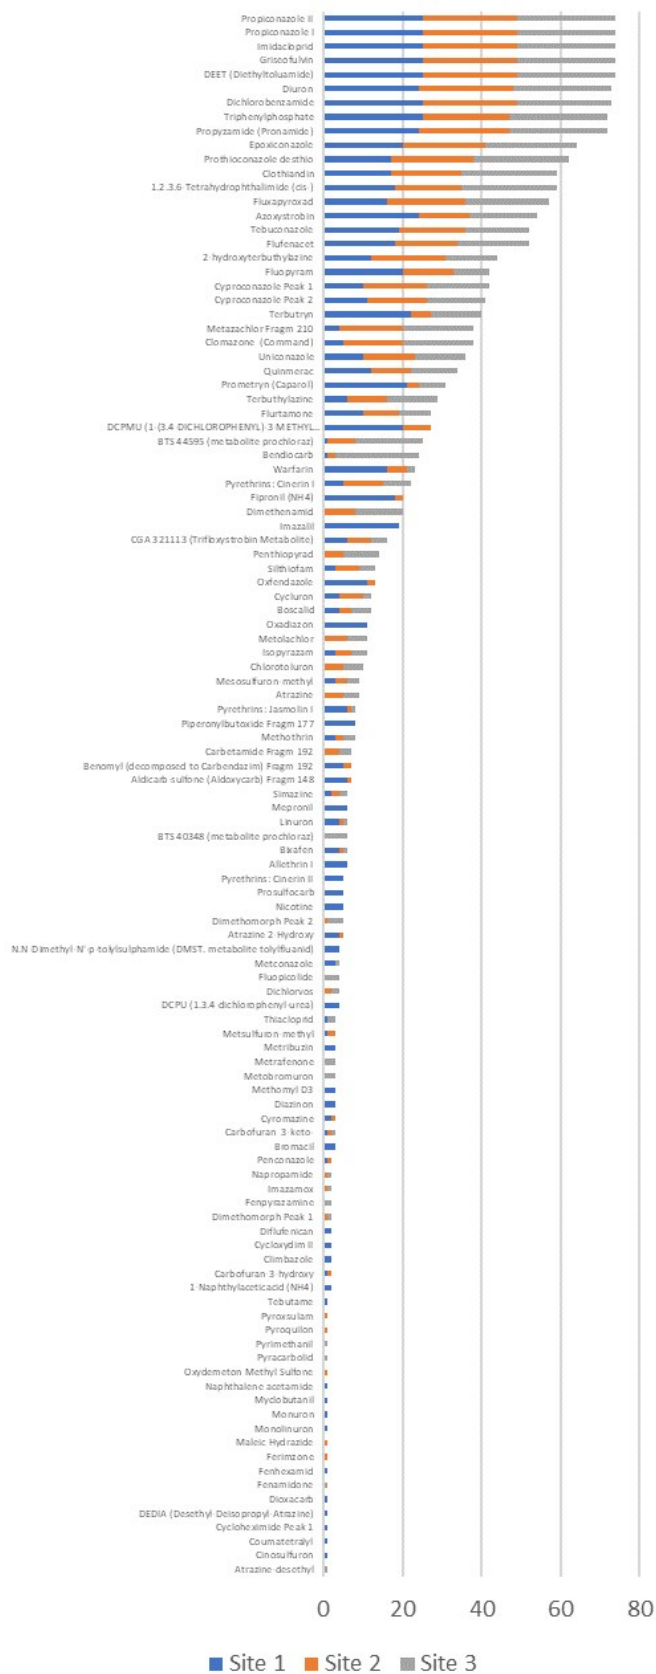

**Fig. S5** Number of detections of polar pesticides with Chemcatcher® PSDs during 25 consecutive deployments at three sites on the River Arun occurring over one year.

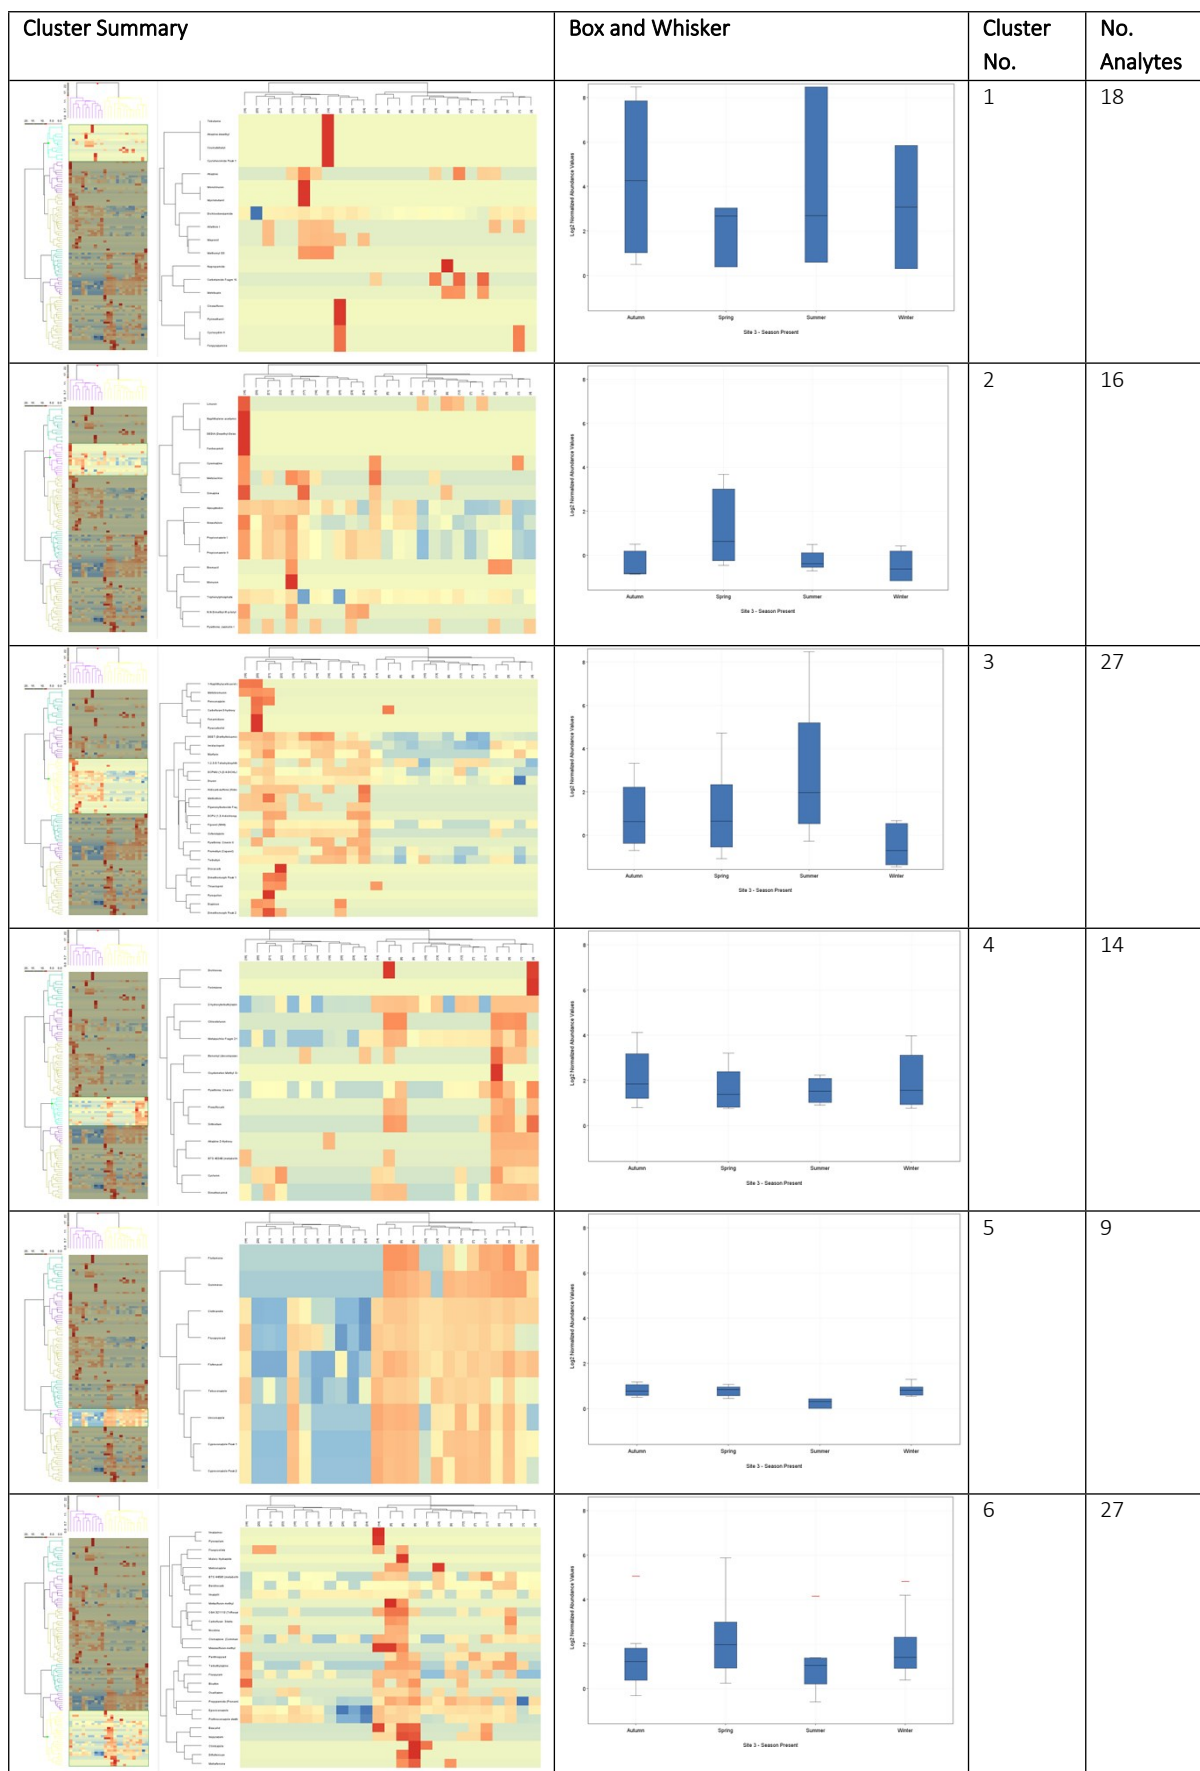

Fig. S6 HCA and box and whisker plots of analytes present in clusters 1-6.



**Table S3** Properties of analytes present in cluster 3.

| Sub Cluster No. | Compound                                 | Chemical class         | Pesticide type                                 | Status                 | Pest                                                                                                                              | Applications                                                                                                                                                                                                                        |
|-----------------|------------------------------------------|------------------------|------------------------------------------------|------------------------|-----------------------------------------------------------------------------------------------------------------------------------|-------------------------------------------------------------------------------------------------------------------------------------------------------------------------------------------------------------------------------------|
| 1               | 1-Naphthylacetic acid (NH <sub>4</sub> ) | Synthetic auxin        | Plant growth regulator                         | Approved, 31/12/2021   | Fruit drop                                                                                                                        | Apples, Pears, Plums, Cherries; Potatoes                                                                                                                                                                                            |
|                 | Metobromuron                             | Urea                   | Herbicide                                      | Approved, 31/12/2024   | Broad-leaved weeds (various)                                                                                                      | Sunflowers; Potatoes; Tomatoes; Soybeans; Tobacco                                                                                                                                                                                   |
|                 | Penconazole                              | Triazole               | Fungicide                                      | Approved, 31/12/2021   | Powdery mildew; Scab; Ring spot; Rusts                                                                                            | Vines, Apples, Pears, Peaches, Plums, Apricots, Strawberries, Ornamentals, Hops, Vegetables, Cucumbers, Tomatoes                                                                                                                    |
| 2               | Carbofuran-3-hydroxy                     | Carbamate              | Insecticide, Nematicide, Acaricide, Metabolite | Transformation product | Spider mites; Nematodes; Aphids; Corn rootworms; Weevils                                                                          | Potatoes; Corn; Rice; Soybean; Fruit including Citrus, Grapes; Vegetables; Cotton; Alfalfa                                                                                                                                          |
|                 | Fenamidone                               | Imidazole              | Fungicide                                      | Not approved           | Early and Late blight, Downy mildew, Alternaria leaf spot, Purple blotch                                                          | Bulb vegetable crops; Potatoes; Tomatoes; Lettuce; Curcubits                                                                                                                                                                        |
|                 | Pyracarbolid                             | Anilide                | Fungicide                                      | Not approved           | Rusts; Smuts; Damping-off; Blister blight                                                                                         | Coffee; Vegetables; Tea; Ornamentals                                                                                                                                                                                                |
| 3               | Diethyltoluamide (DEET)                  | Unclassified           | Insecticide, Repellent                         | Not approved           | Mosquitoes; Ticks; Fleas; Chiggers; Leeches; Gnats; Sand flies; Stable flies; Harvest mites                                       | Human skin; Clothing                                                                                                                                                                                                                |
|                 | Imidacloprid                             | Neonicotinoid          | Insecticide, Veterinary substance              | Approved, 31/07/2022   | Plant hoppers, Aphids, Termites, Colorado beetle, Fleas, White grubs, Crane flies; Crickets, Ants                                 | Lawns and turf; Domestic pets; Rice, Cereals; Maize; Potatoes; Sugar beet                                                                                                                                                           |
|                 | Warfarin                                 | Coumarin anticoagulant | Rodenticide                                    | Not approved           | Rats; Mice; Grey squirrels; Gophers                                                                                               | Pharm* A rarely used anticoagulant rodenticide                                                                                                                                                                                      |
| 4               | 1.2.3.6-Tetrahydrophthalimide (cis-)     | Dicarboximide          | Fungicide                                      | Transformation product | Seed rot; Damping-off; Grey mold; Berry rot; Spur blight; Brown rot; Leaf spot; Downy mildew; Bunch rot; Scab                     | Apples, Apricots, Blueberries, Blackberries, Cherries, Grapes, Raspberries, Nectarines, Plums, Peaches; Almonds; Grasses; Roses                                                                                                     |
|                 | DCPMU (Monomethyl-diuron)                | Phenylurea             | Herbicide                                      | Transformation product | Bermuda grass; Fathen; Pigweed; Charlock; Sow thistle; Wild radish; Wild turnip; Cape weed; Dead nettles; Poppies; Barnyard grass | Vegetables including Asparagus, Peas, Pulses; Fruit Including Bananas, Pineapples, Grapes; Cotton; Lucerne; Lupins; Sugarcane; Cereals including Wheat, Barley, Oats, Triticale; Tea; Ornamentals including tulips, daffodils, iris |
|                 | Diuron                                   | Phenylurea             | Herbicide                                      | Approved, 30/09/2020   | Bermuda grass; Fathen; Pigweed; Charlock; Sow thistle; Wild radish; Wild turnip; Cape weed; Dead nettles; Poppies; Barnyard grass | Vegetables including Asparagus, Peas, Pulses; Fruit Including Bananas, Pineapples, Grapes; Cotton; Lucerne; Lupins; Sugarcane; Cereals including Wheat, Barley, Oats, Triticale; Tea; Ornamentals including tulips, daffodils, iris |
| 5               | Aldicarb-sulfone (Aldoxycarb) Fragn 148  | Carbamate              | Insecticide, Nematicide, Metabolite            | Not approved           | Honey locust; Gall midge; Nematodes                                                                                               | Cotton; Potatoes; Sugar beet; Ornamentals                                                                                                                                                                                           |
|                 | Methoctrin                               | Pyrethroid             | Insecticide                                    | None                   | -                                                                                                                                 | -                                                                                                                                                                                                                                   |
|                 | Piperonylbutoxide Fragn 177              | Synergist              |                                                | None                   |                                                                                                                                   | Synergist (carbamates, pyrethrins, pyrethroids, and rotenone)                                                                                                                                                                       |
|                 | DCPU (1.3.4-dichlorophenyl-urea)         | Phenylurea             | Herbicide                                      | Transformation product | Bermuda grass; Fathen; Pigweed; Charlock; Sow thistle; Wild radish; Wild turnip; Cape weed; Dead nettles; Poppies; Barnyard grass | Vegetables including Asparagus, Peas, Pulses; Fruit Including Bananas, Pineapples, Grapes; Cotton; Lucerne; Lupins; Sugarcane; Cereals including Wheat, Barley, Oats, Triticale; Tea; Ornamentals including tulips, daffodils, iris |
|                 | Fipronil (NH <sub>4</sub> )              | Phenylpyrazole         | Insecticide, Veterinary substance              | Not approved           | Ants, Beetles, Cockroaches, Fleas, Termites, Thrips, Black vine weevil and other insects                                          | Hardy ornamentals; Non-edible ornamentals; Turf                                                                                                                                                                                     |
|                 | Oxfendazole                              | Benzimidazole          | Insecticide, Veterinary                        | None                   | Round worms, strongyles and pin                                                                                                   |                                                                                                                                                                                                                                     |

|   |                        |                 | substance                                               |                      | worms for a range of livestock                                                                                                                                  |                                                                                                                                                             |
|---|------------------------|-----------------|---------------------------------------------------------|----------------------|-----------------------------------------------------------------------------------------------------------------------------------------------------------------|-------------------------------------------------------------------------------------------------------------------------------------------------------------|
| 6 | Pyrethrins: Cinerin II | Pyrethrum       | Insecticide                                             | Approved, 31/08/2022 | Various insect pests                                                                                                                                            | A non-persistent insecticide extracted from Pyrethrum, used to control a variety of pests on crops, in domestic and public health situations                |
|   | Prometryn (Caparol)    | Triazine        | Herbicide                                               | Not approved         | Grasses including barnyard grass, goose grass, ryegrass, prairies grass; Broad-leaved weeds including dead nettle, nightshade, chickweed, fathen, common spurry | A herbicide used to control annual grasses and broad-leaved weeds in a variety of crops                                                                     |
|   | Terbutryn              | Triazine        | Herbicide                                               | Not approved         | Chick weed; Poppies; Black grass; Annual meadow grass; Dead nettle; Cape weed; Hedge mustard; Shepherd's purse; Bind weed; Lupins                               | A pre-emergence herbicide used to control some grasses and broad-leaved weeds. Also used to control aquatic algae. Also a pesticide transformation product. |
| 7 | Dioxacarb              | Carbamate       | Insecticide                                             | Not approved         | Potato bugs, Phyllotreta undulata and Ceutorrhynchus; Leafhoppers; Aphids; Beetles; Cockroaches; Colorado beetle                                                | An obsolete insecticide once used to control pests on potatoes, other crops and non-agricultural sites                                                      |
|   | Dimethomorph Peak 1    | Morpholine      | Fungicide                                               | Approved, 31/07/2020 | Downy mildew; Anthracnose; Phytophthora cactorum, Septoria leaf spot; Late blight; Root rot; Crown rot                                                          | A fungicide effective against various fungal pathogens in vines and other crops                                                                             |
|   | Thiacloprid            | Neonicotinoid   | Insecticide                                             | Approved, 30/04/2020 | Aphids; Pollen beetles; Blossom midge; Codling moth; Wireworm; Fruit fly                                                                                        | A chloronicotinyl insecticide for use on apples and other crops to control sucking and chewing insects                                                      |
|   | Pyroquilon             | Unclassified    | Fungicide                                               | Not approved         | Rice blast                                                                                                                                                      | An unclassified, systemic fungicide used on rice                                                                                                            |
|   | Diazinon               | Organophosphate | Insecticide, Acaricide, Repellent, Veterinary substance | Not approved         | Bean fly; Thrips; Caterpillars; Cabbage white butterfly; Loopers; Cutworms; Livestock pests including mites, ticks, lice and biting flies                       | A broad spectrum insecticide used to control sucking and chewing insects on a wide range of crops including top fruit. Also has livestock applications.     |
|   | Dimethomorph Peak 2    | Morpholine      | Fungicide                                               | Approved, 31/07/2020 | Downy mildew; Anthracnose; Phytophthora cactorum, Septoria leaf spot; Late blight; Root rot; Crown rot                                                          | A fungicide effective against various fungal pathogens in vines and other crops                                                                             |

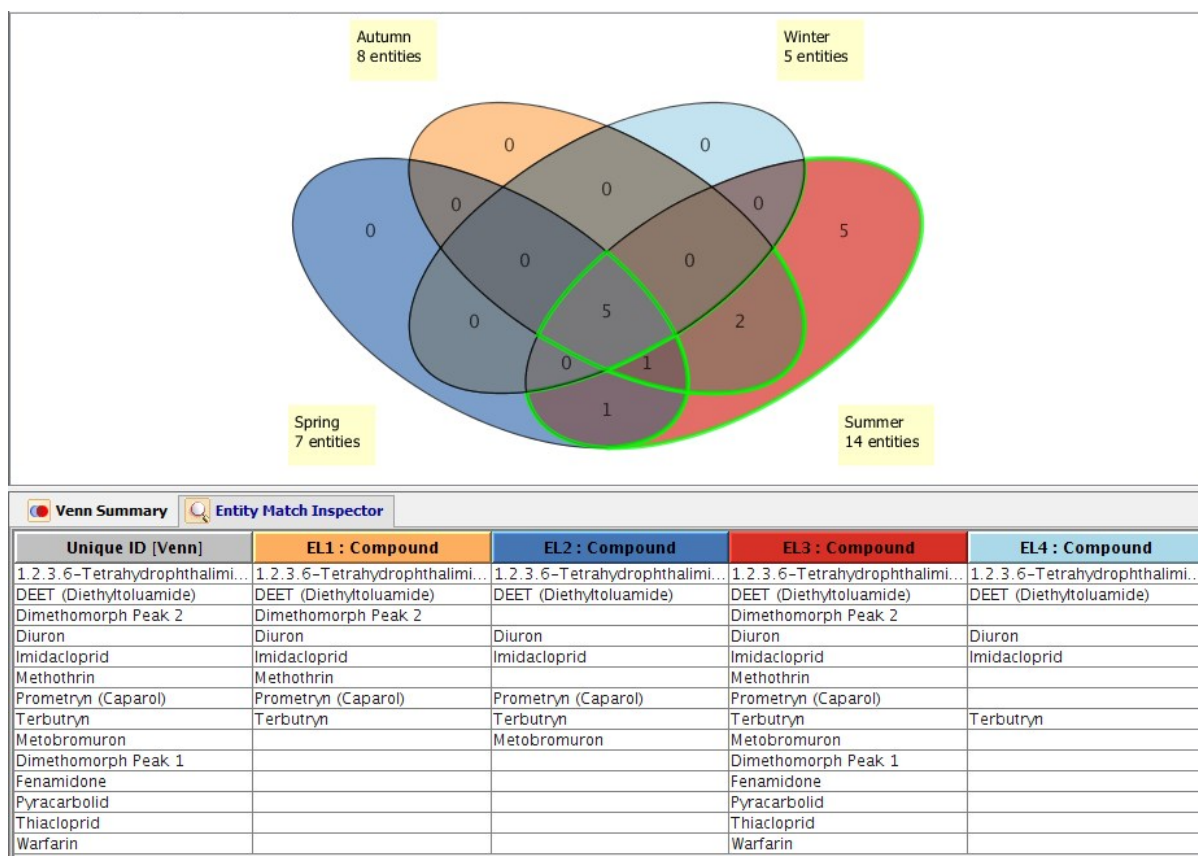

**Fig. S7** Seasonality of cluster 3 pesticide detections at site 3. Highlighted sections in the Venn diagram show the number of detected pesticides. Data table lists pesticides detected in each season (using the colour format from the Venn diagram).

**Table S4** Prioritisation and risk assessment of analytes present at site 3.

| Compound                                      | Site 1       | Site 2       | Site 3       |    | Risk Score | Venn* | Cluster no |
|-----------------------------------------------|--------------|--------------|--------------|----|------------|-------|------------|
| Dichlorobenzamide                             |              |              | A, W, Sr, Su | 73 | High       | ABC   | 1          |
| Griseofulvin                                  | Sr           | Sr           | A, W, Sr, Su | 74 | High       | ABC   | 2          |
| Propiconazole I                               | Sr           | Sr           | A, W, Sr, Su | 74 | High       | ABC   | 2          |
| Propiconazole II                              | Sr           | Sr           | A, W, Sr, Su | 74 | High       | ABC   | 2          |
| Triphenylphosphate                            | Sr           | Sr           | A, W, Sr, Su | 72 | High       | ABC   | 2          |
| Diethyltoluamide (DEET)                       | A, W, Sr, Su | Su           | A, W, Sr, Su | 74 | High       | ABC   | 3          |
| Diuron                                        | A, W, Sr, Su | Su           | A, W, Sr, Su | 73 | High       | ABC   | 3          |
| Imidacloprid                                  | A, W, Sr, Su | Su           | A, W, Sr, Su | 74 | High       | ABC   | 3          |
| 1,2,3,6-Tetrahydrophthalimide ( <i>cis</i> -) | A, W, Sr, Su | Su           | A, W, Sr, Su | 59 | High       | ABC   | 3          |
| Clothianidin                                  | A, W, Sr     | A, W, Sr     | A, W, Sr, Su | 59 | High       | ABC   | 5          |
| Fluxapyroxad                                  | A, W, Sr     | A, W, Sr     | A, W, Sr, Su | 57 | High       | ABC   | 5          |
| Propyzamide (Pronamide)                       | W, Sr        | W, Sr        | A, W, Sr, Su | 72 | High       | ABC   | 6          |
| Prothioconazole desthio                       | W, Sr        | W, Sr        | A, W, Sr, Su | 62 | High       | ABC   | 6          |
| Epoxiconazole                                 | W, Sr        | W, Sr        | A, W, Sr, Su | 64 | High       | ABC   | 6          |
| Bendiocarb                                    | W, Sr        | W, Sr        | A, W, Sr, Su | 24 | High       | ABC   | 6          |
| Azoxystrobin                                  | Sr           | Sr, Su       | A, W, Sr, Su | 54 | Medium     | ABC   | 2          |
| Terbutryn                                     | Su           | Su           | A, W, Sr, Su | 40 | Medium     | ABC   | 3          |
| Metazachlor Fragm 210                         | A, W, Sr, Su | A, W, Sr, Su | A, W, Sr, Su | 38 | Medium     | ABC   | 4          |
| 2-Hydroxyterbuthylazine                       | A, W, Sr, Su | A, W, Sr, Su | A, W, Sr, Su | 44 | Medium     | ABC   | 4          |
| Dimethenamid                                  |              | A, W, Sr, Su | A, W, Sr, Su | 20 | Medium     | BC    | 4          |
| Flufenacet                                    | A, W, Sr     | A, W, Sr     | A, W, Sr     | 52 | Medium     | ABC   | 5          |
| Cyproconazole Peak 1                          | A, W, Sr     | A, W, Sr     | A, W, Sr     | 42 | Medium     | ABC   | 5          |
| Tebuconazole                                  | A, W, Sr     | A, W, Sr     | A, W, Sr     | 52 | Medium     | ABC   | 5          |
| Cyproconazole Peak 2                          | A, W, Sr     | A, W, Sr     | A, W, Sr     | 41 | Medium     | ABC   | 5          |
| Uniconazole                                   | A, W, Sr     | A, W, Sr     | A, W, Sr     | 36 | Medium     | ABC   | 5          |
| Quinmerac                                     | A, W, Sr     | A, W, Sr     | A, W, Sr     | 34 | Medium     | ABC   | 5          |
| Clomazone (Command)                           | W, Sr        | W, Sr        | A, W, Sr     | 38 | Medium     | ABC   | 6          |
| BTS 44595 (metabolite Prochloraz)             | W, Sr        | W, Sr        | A, W, Sr     | 25 | Medium     | ABC   | 6          |
| Terbuthylazine                                | W, Sr        | W, Sr        | A, W, Sr     | 29 | Medium     | ABC   | 6          |
| Metolachlor                                   |              | Sr           | Sr           | 11 | Low        | BC    | 2          |
| Prometryn (Caparol)                           | Su           |              | Su           | 31 | Low        | ABC   | 3          |
| Pyrethrins: Cinerin I                         | A, W         | A, W         | A, W         | 22 | Low        | ABC   | 4          |
| BTS 40348 (metabolite Prochloraz)             |              |              | A, W         | 6  | Low        | C     | 4          |
| Chlorotoluron                                 |              | A, W         | A, W         | 10 | Low        | BC    | 4          |
| Flurtamone                                    | A, W         | A, W         | A, W         | 27 | Low        | ABC   | 5          |
| Fluopyram                                     | W, Sr        | W, Sr        | W, Sr        | 42 | Low        | ABC   | 6          |
| Penthiopyrad                                  |              | W, Sr        | W, Sr        | 14 | Low        | BC    | 6          |
| Boscalid                                      | W, Sr        | W, Sr        | W, Sr        | 12 | Low        | ABC   | 6          |
| Atrazine                                      |              | Su           | Su           | 9  | vLow       | BC    | 1          |
| Carbetamide Fragm 192                         |              | Sr           | Sr           | 7  | vLow       | BC    | 1          |
| Fenpyrazamine                                 |              |              | A            | 2  | vLow       | C     | 1          |
| Atrazine-desethyl                             |              |              | Su           | 1  | vLow       | C     | 1          |

|                                         |      |      |      |    |      |     |   |
|-----------------------------------------|------|------|------|----|------|-----|---|
| Napropamide                             |      | W    | W    | 2  | vLow | BC  | 1 |
| Pyrimethanil                            |      |      | A    | 1  | vLow | C   | 1 |
| Simazine                                | Sr   | Sr   | Sr   | 6  | vLow | ABC | 2 |
| Linuron                                 | Sr   | Sr   | Sr   | 6  | vLow | ABC | 2 |
| Pyrethrins: Jasmolin I                  | Sr   | Sr   | Sr   | 8  | vLow | ABC | 2 |
| Dimethomorph Peak 2                     |      | Su   | Su   | 5  | vLow | BC  | 3 |
| Methothrin                              | Su   | Su   | Su   | 8  | vLow | ABC | 3 |
| Metobromuron                            |      | Su   | Su   | 3  | vLow | C   | 3 |
| Thiacloprid                             | Su   |      | Su   | 3  | vLow | AC  | 3 |
| Warfarin                                | Su   | Su   | Su   | 23 | vLow | ABC | 3 |
| Dimethomorph Peak 1                     |      | Su   | Su   | 2  | vLow | BC  | 3 |
| Fenamidone                              |      |      | Su   | 1  | vLow | C   | 3 |
| Pyracarbolid                            |      |      | Su   | 1  | vLow | C   | 3 |
| Silthiofam                              | A    | A    | A    | 13 | vLow | ABC | 4 |
| Cycluron                                | Su   | Su   | Su   | 12 | vLow | ABC | 4 |
| Dichlorvos                              |      | A, W | A, W | 4  | vLow | BC  | 4 |
| CGA 321113 (Trifloxystrobin Metabolite) | W    | W    | W    | 16 | vLow | ABC | 6 |
| Fluopicolide                            |      |      | Su   | 4  | vLow | C   | 6 |
| Isopyrazam                              | W,Sr | W,Sr | W,Sr | 11 | vLow | ABC | 6 |
| Mesosulfuron-methyl                     | Sr   | Sr   | Sr   | 9  | vLow | ABC | 6 |
| Metrafenone                             |      |      | W    | 3  | vLow | C   | 6 |
| Bixafen                                 | Sr   | Sr   | Sr   | 6  | vLow | ABC | 6 |
| Carbofuran 3-keto-                      |      |      | A    | 3  | vLow | ABC | 6 |
| Imazamox                                |      | Sr   | Sr   | 2  | vLow | BC  | 6 |
| Metconazole                             | Sr   |      | Sr   | 4  | vLow | AC  | 6 |

\*ABC: present site 1,2 and 3, BC: present site 2 and 3, CA: present site 1 and 3, C: present site 3 only.
